# Supplementary material for: SARS-CoV-2 antibodies in Ontario health care workers during and after the first wave of the pandemic: a cohort study
Source: PubMed Central journal article supplement — CMAJ Open. 2021 Oct 12;9(4):E929–39. doi: 10.9778/cmajo.20210044 (PMC8513603; doi:10.9778/cmajo.20210044), 2021-10-12
Supplement: 2021-0044-1-at.pdf [file 2021-0044-1-at.pdf]

## Supplemental Appendix 1, Baseline Survey

### General Information:

1. Age
2. Postal code: first three digits
3. Household information: How many individuals are in your household? What are their ages?
4. What Ethnic group best describes you: European, South Asian, East/Southeast Asian, West Central Asian/ Middle Eastern, West Indian/ Caribbean, African, Latin/ Central/ South American, Aboriginal/ Indigenous, Multi-Ethnic, Canadian/ American, Other
5. What group best describes your ancestry? White/Black/Hispanic/East Asian/Pacific Islander/South Asian, Middle Eastern/Central Asian/Other
6. Any other HCWs in the household? Yes / No
7. Years of employment
8. Gender: Male, female, prefer not to specify
9. Number of shifts (or days worked) in the past 14 days
10. Work Place: ER/Urgent Care, ICU, Inpatient, Outpatient, Surgery/Perioperative care, COVID-19 Assessment Centre, Short stay/Dialysis, Other
11. Role:
  - a. Healthcare care professionals (physicians, nurses, nurse practitioner)
  - b. Allied health worker (phlebotomists, respiratory therapists, social workers, dieticians, diagnostic imaging technician/ physicians physiotherapists, occupational therapists, and dentistry)
  - c. Auxiliary (environmental services personnel, patient transport/ porter, laboratory personnel and ward clerical workers)
12. What PPE do you wear for all patient encounters (i.e for asymptomatic patients not in other precautions)? Check all that apply – face mask, N95 respirators, gown, gloves, eye protection (goggles or face mask)
13. What PPE do you wear for the routine care of suspect or confirmed COVID-19 patients? Check all that apply - face mask, N95 respirators, gown, gloves, eye protection (goggles or face mask)

### Health Information:

14. Self-reported weight
15. Self-reported height
16. Current smoker (vaping included): Yes / No
17. Pregnancy: Yes / No / Unknown; If yes, specify trimester: first, second, third, unknown
18. Underlying Medical Conditions:
  - a. Cancer: yes / no
  - b. Diabetes: yes / no

- i. Has a doctor ever told you that diabetes has affected your eyes; or that you have diabetic retinopathy or have you ever received laser eye therapy for your diabetes?
    - ii. Are you currently taking insulin? Y/N
    - iii. Do you currently take diabetes pills (oral agents or oral hypoglycemic agents) to lower your blood sugar. Y/N
  - c. Immune Deficiency/ HIV: yes / no
    - i. Have you ever received a transplant of an organ other than kidney (e.g. bone marrow, heart, lung, liver or pancreas)?
  - d. Heart disease: yes / no
    - i. Has a doctor or other health professional ever told you that you have coronary/ artery disease (heart attack, angina)? Y/N
    - ii. Have you ever had prior revascularization of your heart/ blood vessels by balloon angioplasty? Y/N
    - iii. Have you ever had a prior revascularization of your heart /blood vessels by coronary stenting? Y/N
    - iv. Have you ever had a prior revascularization of your heart blood vessels by coronary bypass surgery? Y/N
    - v. Has a doctor or other health professional ever told you that you have heart failure? Y/N
    - vi. Has a doctor or other health professional ever told you that you have atrial fibrillation or atrial flutter (an irregular heart rhythm)? Y/N
    - vii. Have you ever had any procedure to open the blood vessels of the neck (carotid endarterectomy)? Y/N
    - viii. Has a doctor or other health professional ever told you that you have hypertension or high blood pressure? Y/N
  - e. Asthma (requiring medication): yes / no
    - i. Have you ever been hospitalized for your asthma? Y/N
    - ii. Do you use an inhaler? Y/N
  - f. Chronic lung disease (non-asthma): yes / no
    - i. Have you ever been hospitalized for COPD? Y/N
    - ii. Do you use an inhaler? Y/N
  - g. Chronic liver disease: yes / no
    - i. Has a doctor or other health professional ever diagnosed or treated you for hepatitis (B or C) infection? Y/N
  - h. Chronic hematologic (blood) disease (e.g. sickle cell disease, hemoglobinopathies): yes / no
  - i. Chronic kidney disease: yes / no

- j. Chronic neurological disease / impairment: yes / no
  - i. Were you ever told by a physician that you had a stroke? Y/N
  - ii. Were you ever told by a physician that you had a transient ischemic attack (TIA), ministroke? Y/N
- k. Inflammatory Diseases: Yes/No
- l. Has a doctor or other health professional ever diagnosed or treated you for rheumatoid arthritis? Y/N
- m. Has a doctor or other health professional ever diagnosed or treated you for gout? Y/N
- n. Other pre-existing condition: yes / no, if yes, specify

#### 19. Medications

- a. Have you ever had a vaccination for Covid-19?
  - i. If yes, how many doses?
  - ii. Please indicate the date each dose was received
  - iii. Please indicate the vaccine manufacturer if able
- b. Do you currently take prescribed medication for your hypertension or high blood pressure? Y/N
- c. Do you currently take prescribed medication for your high blood cholesterol?
- d. Have you ever received treatment with immunosuppressive drugs such as Cyclophosphamide, Cytoxan, Steroids, Prednisone, Cellcept, or Cyclosporine within the past 6 months. Y/N
- e. Any other medication? Y/N. Specify.

20. Any illness or symptoms in the last 3 months: yes / no, if yes, specify

21. Have you ever had any specimens collected for COVID-19 testing (ie NP Swab, Saliva, etc)? : yes / no; if yes, was it positive? Yes / no; if yes, specify date

22. Any history of blood transfusion or immunoglobulin in the last year? Yes / No; if yes, specify date

#### Exposure history:

23. Any sick contacts in the household in the last 3 months? Yes / no; if yes, what are the ages of sick contacts? have they been tested for COVID-19? Yes/no; if yes, was the result positive? Yes / no / unknown

24. Have you provided direct care to a patient with COVID-19? Yes / No; if yes, how often? Daily, 2-3 times per week, weekly, rarely

25. If yes to 24, have you had any unprotected exposures (i.e within 2 m of the patients without appropriate PPE)? Yes / No; if yes, please specify date(s) and describe exposure(s)

26. If yes to 24, did you perform any aerosol generating medical procedures? (link to PHO list to specify) Yes / No, if yes; list procedure

27. Have you worked on a unit where a COVID-19 outbreak has been declared (during the outbreak period)? if yes, how often? Daily, 2-3 times per week, weekly, rarely

28. Have you been diagnosed by SARS or MERS? Yes / No; if yes, please specify date:

29. Have you been contacted by Public Health to indicate you may have been exposed to someone with COVID-19? Yes / No
30. Have you ever been notified by the COVID Alert App that you may have been exposed to someone with COVID-19?
31. In the last two weeks, how often have you left the house per week (excluding work)? 1 time, 2-4 times, 3-5 times, > 5 times
32. When leaving the house, did you adhere to physical distancing (staying > 2 m away from non-household contacts); always, most of the time, sometimes, never
33. When leaving the house, did you wear a facemask? Always, most of the time, sometimes, never
34. Any travel in the last 4 months? Yes / No, specify country (drop down list) and dates
35. Any other important information we should know related to COVID-19 exposure or risk?
